# Supplementary material for: Institutional Readiness and Diagnostic Challenges for the Management of Pyrexia of Unknown Origin (PUO) in Nepal: A Mixed-Methods Study at Tertiary Level Hospitals
Source: Research Square preprint supplement (doi:10.21203/rs.3.rs-8662503/v1), 2026-02-22
Supplement: Supplementary file 1 [file 361b871543abdcd7ef41a685.docx]

**Study on**

**Institutional Readiness and diagnostic challenges for the management of Pyrexia of Unknown Origin (PUO) in Nepal: A cross- sectional study at tertiary- level hospitals**

**KII Guidelines: Medical / Hospital Superintendent**

**Section 1: Introduction and Consent**

(Note: Please make sure that all the steps are completed and then marked ☑, step by step.)

- Greet the informant and introduce yourself and the research team.
- Introduce the study objectives briefly and propose of this interview.
- Emphasize confidentiality and voluntary participation.
- Request verbal or written informed consent.
- State the interview duration (approximately 30–45 minutes).
- Ask permission to record (audio or notes).
- Ask: Do you have any questions about the study before we begin?

**Section 2: Background Information of Respondent**

Hospital Name :

Current Designation :

Educational qualification:

Year of experience as Hospital Administrator or Medical Superintendent :

Years at this hospital :

Interview Date :

Interview start time :

Interview end time :

Interviewer Name :

**Section 3: Organizational Structure and PUO Case Management**

1. Does your facility have a standard protocol or guideline for evaluating PUO cases?
   *(Probe: Are there clinical pathways, checklists, or SOPs used?)*
2. Which departments are primarily responsible for handling PUO cases?
   *(Probe: How is coordination managed between Internal Medicine, Infectious Disease, Laboratory, and Radiology?)*
3. How are responsibilities shared among the medical team when managing complex or undiagnosed febrile cases?
   *(Probe: Is there a designated focal person or team for PUO cases?)*
4. Does the hospital collaborate with external partners (e.g., public health authorities, referral labs) for PUO management?
   *(Probe: What types of partnerships exist, and how effective are they?)*

**Section 4: Infrastructure and Human Resource Capacity**

1. How do resource constraints (e.g., budget, staffing, and infrastructure) affect the hospital’s ability to manage PUO cases?
   *(Probe: Diagnostic capacity, inpatient beds, ICU availability, trained personnel?)*
2. Are there specific human resource gaps that hinder optimal PUO case management?
   *(Probe: Availability of infectious disease physicians, lab specialists, nurses?)*
3. Are there structured training opportunities or CME for your staff on PUO and related febrile illness management?
   *(Probe: Frequency, content, and participation levels?)*
4. Are there issues with procurement or supply chains for PUO-related diagnostics or treatments (e.g., reagents, antibiotics)?
   *(Probe: Frequency of stock outs, procurement delays?)*
5. Are there mechanisms to ensure quality assurance for PUO diagnostics and management (e.g., audits, oversight committees)?
   *(Probe: How are these mechanisms implemented?)*

**Section 5: Data, Surveillance, and Reporting**

1. Is there a mechanism in place for documenting or reporting PUO cases?
   *(Probe: Electronic Health Records, manual logs, national reporting platforms?)*
2. Are PUO cases reported to any public health authorities or included in surveillance systems?
   *(Probe: How frequently is data shared with municipality, province, or federal levels?)*

**Section 6: Administrative and Operational Challenges**

1. What are the major clinical or administrative challenges your facility faces in managing PUO?
   *(Probe: Delays in diagnosis, limited tests, treatment dilemmas, patient referrals?)*
2. Are there system-level bottlenecks that contribute to delays or poor outcomes?
   *(Probe: Referral delays, transportation issues, insurance coverage, overcrowding?)*
3. How do you handle PUO cases that remain undiagnosed after extensive work-up?
   *(Probe: Referral strategy, discharge policy, follow-up mechanisms?)*

**Section 7: Support Needs and Future Planning**

1. In your opinion, what support is needed to improve PUO case management at your hospital?
   *(Probe: Infrastructure, staffing, diagnostics, interdepartmental coordination?)*
2. Would your hospital be interested in participating in a PUO-focused program or research initiative?
   *(Probe: Involvement in pilot diagnostics, surveillance networks, capacity building)*
3. Are there plans to upgrade or expand diagnostic or clinical capabilities for undiagnosed febrile illnesses?
   *(Probe: New equipment, training, or partnerships?)*

**Closing**

- Is there anything else you’d like to share about the PUO situation in your hospital?
- Would you be open to future communication or follow-up if we need further clarification?
