# Supplementary material for: Institutional Readiness and Diagnostic Challenges for the Management of Pyrexia of Unknown Origin (PUO) in Nepal: A Mixed-Methods Study at Tertiary Level Hospitals
Source: Research Square preprint supplement (doi:10.21203/rs.3.rs-8662503/v1), 2026-02-22
Supplement: Supplementary file 2 [file 741fd348f3e9f63739b3fc7b.docx]

**Study on**

**Institutional Readiness and diagnostic challenges for the management of Pyrexia of Unknown Origin (PUO) in Nepal: A cross- sectional study at tertiary- level hospitals**

**KII Guidelines: Senior Consultant – Internal Medicine / Infectious Disease**

**Section 1: Introduction and Consent**

(Note: Please make sure that all the steps are completed and then marked ☑, step by step.)

- Greet the informant and introduce yourself and the research team.
- Introduce the study objectives briefly and propose of this interview.
- Emphasize confidentiality and voluntary participation.
- Request verbal or written informed consent.
- State the interview duration (approximately 30–45 minutes).
- Ask permission to record (audio or notes).
- Ask: Do you have any questions about the study before we begin?

**Section 2: Background Information of Respondent**

Hospital Name :

Current Designation :

Educational qualification:

Year of experience in internal medicine/infectious diseases :

Years at this hospital :

Interview Date :

Interview start time :

Interview end time :

Interviewer Name :

**Section 3: Clinical Case Management of PUO**

1. How frequently do you encounter PUO cases in your department (monthly or yearly)?
   *(Probe: age distribution, referral sources, seasonal patterns)*
2. What is the usual clinical pathway for a PUO case from admission to discharge?
   *(Probe: definition of PUO used, first-line vs. advanced diagnostics, use of internal vs. external labs, average number of tests performed, at what stage is the case labeled PUO)*
3. How do you approach cases where PUO remains undiagnosed despite investigations?
4. What guides your decision to initiate empirical treatment (e.g., antibiotics) in PUO cases?
5. Is there any standardized clinical protocol or algorithm followed for PUO management at your hospital?

**Section 4: Diagnostic Challenges in PUO**

1. What key clinical and laboratory investigations are routinely performed in PUO cases?
2. What are the main challenges in diagnosing PUO at this hospital?
   *(Probe: availability of tests, affordability, result delays, test reliability, referral to outside labs)*
3. How do limitations in diagnostics affect clinical management and patient outcomes?
   *(Probe: common delays, test unavailability, misdiagnosis)*
4. Are there specific diseases (e.g., tuberculosis, enteric fever, viral infections) that are particularly hard to diagnose in PUO cases?
5. What challenges exist from the patient side that affects diagnosis and management?
   *(Probe: delayed care-seeking, out-of-pocket expenses, preference for OTC medications, lack of awareness, follow-up compliance, and geographic barriers)*
6. Are there any gaps in availability or coordination of trained personnel and laboratory services?

**Section 5: Institutional Readiness and System-Level Issues**

1. How would you describe your hospital’s overall capacity to manage complex PUO cases compared to other tertiary centers in Nepal?

*(Probe: human resources, infrastructure, equipment, medications, IPC, referral capacity)*

1. Are clinicians and staff adequately trained to manage PUO cases? What training gaps exist?
2. How effective is the coordination between clinical, diagnostic, and imaging departments for PUO cases?
3. Are there hospital policies or systems that support or hinder effective PUO management?
4. What improvements would most enhance this hospital’s readiness to manage PUO?
5. What is your perception of the feasibility and potential utility of introducing advanced diagnostics like mNGS or nanopore sequencing (ONT) for PUO in this setting?
6. How prepared is your institution to handle PUO cases linked to outbreak-prone or emerging infectious diseases?
7. Is there any access to telemedicine, remote consultation, or digital diagnostic systems?
8. What suggestions do you have for improving digital integration in PUO diagnosis and management?

**Section 6: Recommendations and Closing Reflections**

1. What are your top recommendations to strengthen PUO diagnosis and management at tertiary hospitals?
2. What suggestions would you give for policy-level improvements or health system interventions?
3. How can we better engage clinicians like you in PUO research and implementation efforts?

**Closing Remarks**

- Thank you for your valuable time and insights. Your feedback will help inform our study and improve PUO-related services in Nepal.
- We may follow up for clarification, if needed. Would you be open to future contact?
