# Supplementary material for: Institutional Readiness and Diagnostic Challenges for the Management of Pyrexia of Unknown Origin (PUO) in Nepal: A Mixed-Methods Study at Tertiary Level Hospitals
Source: Research Square preprint supplement (doi:10.21203/rs.3.rs-8662503/v1), 2026-02-22
Supplement: Supplementary file 3 [file 7cef4c90a7bc9fa6eece2e12.docx]

**Institutional readiness and diagnostic challenges for the management of Pyrexia of unknown origin (PUO) in Nepal: A cross-sectional study at tertiary-level hospital**

**Quantitative Questionaire**

**Part 1 General Information**

| Section 1: General Facility Information | | |
| --- | --- | --- |
| Date of Assessment: ___/____/________(Day/Month/Year) | | |
| Name of Health Facility/ Hospital: | | |
| Established year: | | |
| Approved number of beds: | | |
| Type of Facility: ☐ Government ☐ Private ☐ Teaching ☐ Other (specify): | | |
| Facility Address | Province : | |
| District: | |
| Name of Municipality/ RM: | |
| Ward No. : | |
| Name of Director / Medical Superintendent: | | |
| Contact Number: Email ID: | | |
| Hospital Infrastructure & Capacity | | |
| Total Number of Buildings: | | |
| Total Floors: | | |
| Total no. of General beds (includes medical, surgical) :  Total no. of inpatient beds (excluding maternity beds):  Adult ICU Beds:  Adult HDU Beds:  Functional Adult Ventilators:  Holding area Beds: | | Total allocated pediatric beds:  NICU Beds:  Pediatric ICU Beds:  Functional Padiatric Ventilators: |
| Internal Medicine Department Yes No If Yes, bed allocated:  Infectious Disease Department Yes No If Yes, bed allocated:  Fever Clinic: Yes No If Yes, bed allocated:  Emergency Room (24-hour staffed) Beds allocated:  Beds allocated for PUO/Undiagnosed Fever (if any): | | |
| Holding Area Beds: | | Access to road facility: |
| Number of ambulances (specify category if applicable):  Distance to nearest referral lab for advanced tests (km):  Access to all weather road (tick one) Yes No | | |

| Section 2: Diagnostic and Imaging Services | | | |
| --- | --- | --- | --- |
| Service | Available On-Site | If, Ref, Average turnaround time | Note on Functionality |
| X- ray | ☐ Yes ☐ No | ______ days |  |
| Ultrasound | ☐ Yes ☐ No | ______ days |  |
| CT Scan | ☐ Yes ☐ No | ______ days |  |
| MRI | ☐ Yes ☐ No | ______ days |  |
| PET- CT | ☐ Yes ☐ No | ______ days |  |
| Laboratory (Basic Clinical Lab) | | ☐ Yes ☐ No |  |
| On-site microbiology lab | | ☐ Yes ☐ No |  |
| Molecular testing capacity (PCR, GeneXpert) | | ☐ Yes ☐ No |  |
| -20°C freezer for sample storage | | ☐ Yes ☐ No |  |
| -80°C freezer for sample storage | | ☐ Yes ☐ No |  |
| External referral partnerships? | | ☐ NPHL ☐ Private ☐ Research Institutes | |
| Pharmacy (24-hour) | | ☐ Yes ☐ No |  |
| Central Sterile Services Department (CSSD) | | ☐ Yes ☐ No |  |
| Blood Bank / Transfusion Service | | ☐ Yes ☐ No |  |
| Other (Specify): | |  |  |

| Section 3: Other Activities/Services: Digital Health and Continuing Education |
| --- |
| 1. Telemedicine and Digital Consultations   - 1. Does the hospital provide telemedicine or remote consultation services for PUO or prolonged febrile cases?   ☐ Yes  ☐ No   - 1. If yes, which departments/specialists are primarily involved? (Tick all applicable):?   ☐ Internal Medicine ☐ Infectious Disease ☐ Emergency ☐ Others: __________   - 1. Is telemedicine used for preliminary assessment or follow-up of PUO or prolonged febrile cases?   ☐ Yes  ☐ No   - 1. What modes of telemedicine are in use?   ☐ Phone calls ☐ Video conferencing ☐ Mobile app ☐ Social media ☐ Other: _______  2. Use of Electronic Health Records (EHR) and Laboratory Information Systems   - 1. Is there a hospital-wide electronic health record (EHR) or HMIS system in use?   ☐ Yes  ☐ No If Yes, Name of HER:   - 1. Does the EHR system capture clinical pathways, laboratory results, and referral records for PUO cases?   ☐ Yes  ☐ No  ☐ Partially   - 1. Are PUO cases traceable through the system for follow-up and audit purposes?   ☐ Yes  ☐ No   - 1. Does the EHR system support data sharing with external laboratories for advanced PUO diagnostics?   ☐ Yes  ☐ No  ☐ Planned  3. Data Use and Analytics   - 1. Does the hospital analyze clinical or laboratory data to identify patterns or improve decision-making for PUO or infectious diseases (e.g., via dashboards, HMIS reports)?   ☐ Yes  ☐ No  ☐ Occasionally  4. Capacity Building and CME   - 1. Does the hospital conduct regular Continuing Medical Education (CME) or clinical update sessions?   ☐ Yes  ☐ No   - 1. Have any CME or clinical sessions focused on undiagnosed febrile illness or PUO been conducted in the last 6 months?   ☐ Yes  ☐ No If yes, mention topic(s): __________________________   - 1. Who typically participates in CME?   ☐ Doctors only ☐ Doctors and Nurses ☐ All clinical staff ☐ Varies by topic  5. Digital Diagnostic Tools or Platforms   - 1. Is the hospital using or planning to adopt AI or digital diagnostic decision-support tools for PUO or infectious disease management?   ☐ Yes  ☐ No  ☐ Under consideration   - 1. If yes, are these tools applied to PUO or undiagnosed febrile cases?   ☐ Yes  ☐ No  ☐ Not applicable   - 1. What are the main barriers to adopting digital diagnostic tools for PUO management? (Tick all applicable):    Cost  Lack of training  Infrastructure limitations   Lack of awareness  Other (Specify): |

| Section 4: Human Resources | |
| --- | --- |
| **4.1 Staff Availability** | **Number (*Currently available)** |
| Infectious Disease Specialists |  |
| Internal Medicine Physicians |  |
| Medical Officers |  |
| Residents |  |
| Nurses in Critical Care (ICU/HDU) |  |
| ICU-trained nurses (adult + paed) |  |
| Microbiologists/Pathologists |  |
| Laboratory Technicians |  |
| Biomedical Engineers |  |
| Staff trained in molecular techniques |  |
| Staff certified in bio-specimen shipping |  |
| Others (Relavant to PUO) |  |
| Are there any staffing challenges specifically affecting PUO case management? | ☐ Yes  ☐ No  If yes, please specify (e.g., lack of specialists, nurse shortages, workload burden): |

| Section 5: Hospital Record Data (Last 3 Fiscal Years) | | | | |
| --- | --- | --- | --- | --- |
| **Indicator** | **FY 2081/82** | **FY 2080/81** | **FY 2079/80** | **Remarks** |
| 1. Total outpatient (OPD) visits |  |  |  |  |
| 1. Total inpatient (IPD) admissions |  |  |  |  |
| 1. Total blood cultures performed |  |  |  |  |
| 1. Total CBC (Complete Blood Count) tests done |  |  |  |  |
| 1. Total LFT (Liver Function Test) and RFT (Renal Function Test) |  |  |  |  |
| 1. Fever cases (OPD) |  |  |  |  |
| 1. PUO Cases (OPD) |  |  |  |  |
| 1. Prolonged febrile illness/PUO cases (IPD) |  |  |  |  |
| 1. Total referrals made |  |  |  |  |
| 1. Number of diagnostic tests referred out |  |  |  |  |
| Others: |  |  |  |  |
|  |  |  |  |  |
|  |  |  |  |  |

**Part 2: Specific questionaire to Hospital Readiness**

[**Note:** This section specifically focuses on the hospital's readiness and systems related to Pyrexia of Unknown Origin (PUO). However, recognizing that most hospitals may not maintain PUO-specific records or protocols, please also consider any existing provisions, guidelines, or practices that address Undifferentiated Febrile Illness (UFI) or Prolonged Febrile Illness (PFI). If a question does not explicitly mention PUO but a relevant system exists for UFI or PFI, please record that information and clarify it in the “Remarks” column.]

| Section 6: Hospital Readiness | | | | | |
| --- | --- | --- | --- | --- | --- |
| 1. LEADERSHIP AND COORDINATION | | | | | |
| S.N | **Questions** | **Yes** | **No** | **Means of verification** | **Remarks** |
| 1 | Does the hospital have a designated PUO focal person or committee? |  |  |  |  |
| 2 | Are PUO-specific clinical guidelines or SOPs available and in use? |  |  |  |  |
| 3 | Has the hospital conducted any PUO-specific response drills or simulations? |  |  |  |  |
| 4 | Is there an SOP for internal coordination among departments handling PUO cases? |  |  |  |  |
| 5 | Is there a formal mechanism (Excluding DHIS2) to report PUO cases to public health authorities (Except DHIS2) ? |  |  |  |  |
| 1. Risk Communication | | | | | |
| 6 | Are PUO updates or case alerts regularly communicated to hospital staff? |  |  |  |  |
| 7 | Has the hospital developed PUO awareness materials/messages for patients or visitors?  (Patient/visitor information leaflets) |  |  |  |  |
| 1. Human Resources and Surge Capacity | | | | | |
| 8 | Does the hospital have a surge plan to manage increased PUO admissions? |  |  |  |  |
| 9 | Are there pre-identified additional beds or wards for PUO patients if needed? |  |  |  |  |
| 10 | Are critical care services (e.g., ICU, oxygen, power supply) ensured for PUO patients during high case loads? |  |  |  |  |
| 1. Patient Management and Diagnostics | | | | | |
| 11 | Are triage and screening procedures established for identifying PUO or prolonged febrile illness cases? |  |  |  |  |
| 12 | Is there a protocol for laboratory testing and diagnostic workup of PUO cases?Is there adequate PPE and isolation capacity for PUO cases of suspected infectious origin? |  |  |  |  |
| 13 | Is there a formal referral system for PUO cases requiring advanced diagnostics (e.g., PCR, mNGS) at external facilities? |  |  |  |  |
| 14 | Are quality control measures (e.g., internal calibration, external proficiency testing) in place for PUO-related diagnostic tests? |  |  |  |  |
| 15 | Is there a reliable supply chain for PUO-related diagnostic reagents (e.g., blood culture media, serology kits)? |  |  |  |  |

| Section 7: Availability of Routine Diagnostic Tests for PUO / Prolonged Febrile Illness | | | |
| --- | --- | --- | --- |
| **S.N.** | **Diagnostic Test** | **Available (Yes/No)** | **Remarks** |
|  | Complete Blood Count (CBC) |  |  |
|  | Erythrocyte Sedimentation Rate (ESR) |  |  |
|  | Liver Function Tests (LFTs) |  |  |
|  | Renal Function Tests (RFTs) |  |  |
|  | Blood Culture |  |  |
|  | Urine Routine and Microscopy |  |  |
|  | Urine Culture |  |  |
|  | Chest X-ray |  |  |
|  | Abdominal Ultrasound |  |  |
|  | Widal Test / Typhoid Serology |  |  |
|  | Dengue NS1 / IgM |  |  |
|  | Malaria RDT / Microscopy |  |  |
|  | Leptospira Serology |  |  |
|  | Brucellosis serology |  |  |
|  | Scrub Typhus Serology |  |  |
|  | Tuberculosis (e.g., GeneXpert, AFB) |  |  |
|  | ANA / Rheumatologic tests |  |  |
|  | HIV Test |  |  |
|  | Hepatitis B / C Test |  |  |
|  | COVID-19 Test (RT-PCR or Ag) |  |  |
|  | Others (Specify): |  |  |
|  |  |  |  |
|  |  |  |  |
|  |  |  |  |
|  |  |  |  |

**Observations and Comments (Optional):** Please use this space to note any unusual findings, challenges during data collection, or any information that may be important for interpretation but not captured in structured questions.

Name of Data collector: Date: Phone:

Veried by Supervisor: Date: Phone:

**Thank you.**
