# Supplementary material for: Institutional Readiness and Diagnostic Challenges for the Management of Pyrexia of Unknown Origin (PUO) in Nepal: A Mixed-Methods Study at Tertiary Level Hospitals
Source: Research Square preprint supplement (doi:10.21203/rs.3.rs-8662503/v1), 2026-02-22
Supplement: Supplementary file 4 [file fb675015714a358862b3503d.docx]

**Study on**

**Institutional Readiness and diagnostic challenges for the management of Pyrexia of Unknown Origin (PUO) in Nepal: A cross- sectional study at tertiary- level hospitals**

**KII Guidelines: Chief – Microbiology or Laboratory Services**

**Section 1: Introduction and Consent**

(Note: Please make sure that all the steps are completed and then marked ☑, step by step.)

- Greet the informant and introduce yourself and the research team.
- Introduce the study objectives briefly and propose of this interview.
- Emphasize confidentiality and voluntary participation.
- Request verbal or written informed consent.
- State the interview duration (approximately 30–45 minutes).
- Ask permission to record (audio or notes).
- Ask: Do you have any questions about the study before we begin?

**Section 2: Background Information of Respondent**

Hospital Name :

Current Designation :

Educational qualification:

Year of experience in diagnostic work :

Years at this hospital :

Interview Date :

Interview start time :

Interview end time :

Interviewer Name :

**Section 3: Diagnostic Workflow for PUO**

1. Can you describe the typical diagnostic workflow when a patient presents with PUO?

(*Probe:* Walk me through each step, from patient presentation to diagnosis.)

1. How are test decisions made when PUO is suspected? Is there a standard protocol or clinician-driven?

*(Probe: Who ultimately approves expensive/advanced tests?)*

1. What are the key diagnostic tests performed for PUO cases, and how are they selected?

*(Probe: Include examples like blood cultures, serology, PCR. For endemic pathogens like scrub typhus or kala-azar, how quickly can you turn around these specific tests?)*

1. Does your facility use standardized PUO test bundles? If yes, when were they last updated?

*(Probe: How are these panels chosen or updated?)*

1. How do you coordinate with clinicians when PUO is suspected?

*(Probe: Is there a multidisciplinary team or routine meetings for discussion?)*

1. Are PUO samples prioritized over routine samples? If yes, by what mechanism?

*(Probe: Do PUO samples get treated as urgent cases?)*

1. What are the strengths of your laboratory in supporting PUO diagnosis compared to other tertiary hospitals?

*(Probe: What specific infrastructure, expertise, or technologies give your laboratory an advantage for PUO diagnostics?, rapid fungal culture, autoantibody panels)*

1. How are samples preserved when diagnosis remains elusive? Is there a protocol for long-term storage at -80°C?

**Section 4: Diagnostic Capacity, Readiness, and Challenges**

1. Are there any gaps in the availability of essential PUO diagnostic tests, and how are these gaps managed?
2. How feasible is it to integrate advanced molecular tests like mNGS into your current workflow?
3. Which PUO-related tests would you like to offer but currently cannot?

*(Probe: What barriers prevent their implementation?)*

1. What are the main limitations or shortages you face in diagnosing PUO cases?

*(Probe: Reagents, test kits, power issues, human resources, equipment, maintenance?)*

1. How do these limitations impact the accuracy or efficiency of PUO diagnosis?

*(Probe: Any specific examples of delays or diagnostic failures?)*

1. Are there specific PUO-related pathogens or conditions that are particularly difficult to diagnose?

*(Probe: Why are they difficult sample quality, lack of appropriate tests, etc.?)*

1. Do you refer PUO-related samples to other labs?

*(Probe: Which labs do you refer to and for what types of tests?)*

1. What specific quality control measures (e.g., internal calibration, external proficiency testing, NPHL certification) are in place for PUO diagnostics?
2. Do you feel the current number of laboratory staff is adequate to handle PUO-related diagnostics?

(*Probe: Are there issues with night shifts, emergency requests, or staff retention?)*

1. What infrastructure upgrades are needed to support advanced PUO diagnostics, such as molecular or sequencing-based tests?

(*Probe: Consider biosafety labs, IT systems, equipment, cold chain, etc.)*

1. How does your laboratory collaborate with external facilities for advanced PUO diagnostics (e.g., referral labs, research institutes)?

**Section 5: Perspectives and Future Directions**

1. In your opinion, what improvements are needed to strengthen PUO diagnostic capacity in your facility?

*(Probe: Capacity building, infrastructure, SOP development, training, equipment?)*

1. What support would you like from hospital management or government authorities to improve PUO diagnostics?

*(Probe: Funding, training, partnerships, procurement streamlining?)*

1. Would your laboratory be interested in participating in future research, pilot diagnostics, or surveillance projects for PUO?

*(Probe: What kind of collaborations would be most useful?)*

**Closing**

1. Is there anything else you would like to add regarding PUO diagnostics?
2. Would you be open to follow-up communication if we require further clarification?
